# Supplementary material for: Effect of Resveratrol on Reactive Oxygen Species-Induced Cognitive Impairment in Rats with Angiotensin II-Ind uced Early Alzheimer’s Disease
Source: MDPI journal article supplement (doi:10.3390/jcm7100329), 2018-10-05
Supplement: s1 [file s1]

Supplementary Material

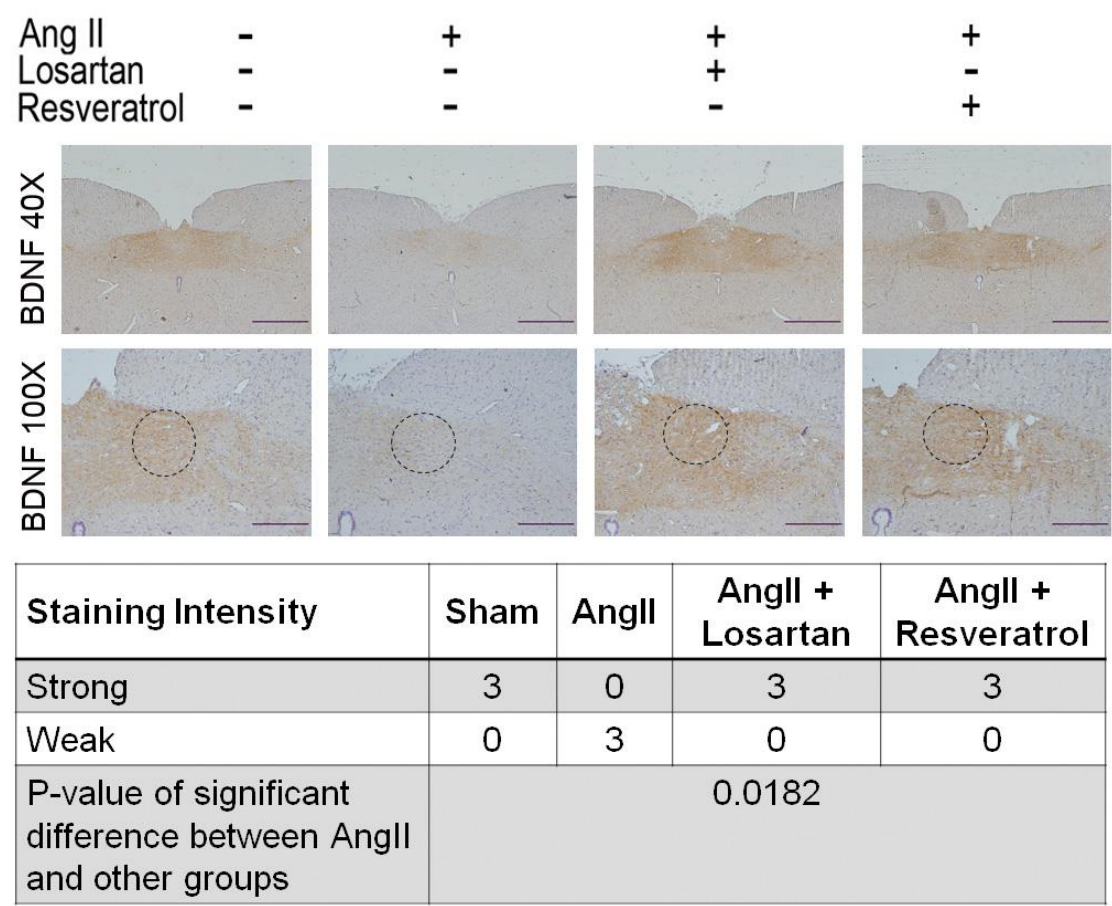

**Figure S1.** BDNF levels were decreased in rats with Ang-II-induced early Alzheimer’s disease (AD). *In situ* qualitative analysis of BDNF-immunopositive cells in the nucleus tractus solitarius (NTS) of AD model rats. Scale bar, 200 mm. BDNF-expressing cells after treatment with Ang-II and/or losartan or resveratrol. Note the significant increase in Ang-II-induced BDNF production after the administration of losartan or resveratrol. BDNF: brain-derived neurotrophic factor.
